# Supplementary material
Source: publisher figshare collection journal article supplement (https://asha.figshare.com/ndownloader/files/17598227)
Supplement: Supplementary file 1 [file 17598227]

## Sheet: Word_Summary
Supplemental material, Storkel et al., “The Impact of Dose and Dose Frequency on Word Learning by Kindergarten Children With Developmental Language Disorder During Interactive Book Reading,” LSHSS, https://doi.org/10.1044/2019_LSHSS-VOIA-18-0131
Supplemental Material S9. Percent of children who defined the target word (Column C) correctly at the final treatment session (Column N) or immediate post test (Column O) relative to other characteristics of the word or the exposure context (Columns E-M) and relative to child performance in the prior study (Column P). Pink shading indicates values that changed from the prior study due to revision…
Book Title	Book Author	Target Word	Part of Speech	Frequency of Target Word (Storkel & Hoover, 2010)	# of Words in Definition	Average Frequency of Words in Definition (Storkel & Hoover, 2010)	# of Words in Synonym	Frequency of Synonym (Storkel & Hoover, 2010)	# of Words in Context Sentence	Average Frequency of Words in Context Sentence	# of Words in Book Text Sentence	Average Frequency of Words in Book Text Sentence (Storkel & Hoover, 2010)	% Children Defined Word Correctly at Final Tx (Current Study)	% Children Defined Word Correctly at Post (Current Study)	% Children Defined Word Correctly at Post in Storkel, Voelmle, et al. (2017)
Book! Book! Book!	Bruss, 2001	gathered	verb	2	7	1983	1	3	12	3105	21	376	0.12	0.21	0.153846
Book! Book! Book!	Bruss, 2001	heaved	verb	0	6	1529	1	12	10	621	5	1	0.29	0.09	0.0769231
Book! Book! Book!	Bruss, 2001	pouted	verb	0	8	1951.8	1	0	11	1866	3	60	0.41	0.15	0.461538
Book! Book! Book!	Bruss, 2001	ruffle	verb	0	10	1594	1	8	10	1349	11	68	0.15	0.03	0.0769231
Book! Book! Book!	Bruss, 2001	squawked	verb	0	7	2858	1	10	13	1624	13	358	0.32	0.12	0.153846
Book! Book! Book!	Bruss, 2001	whinnied	verb	0	9	1613	1	0	10	774	5	33	0.53	0.18	0.0769231
Harry and the Terrible Whatzit	Gackenback, 1977	damp	adjective	8	4	41	2	3441	9	494	12	486	0.15	0.15	0.230769
Harry and the Terrible Whatzit	Gackenback, 1977	discovered	verb	0	5	868	1	480	11	266	15	1155	0.29	0.09	0
Harry and the Terrible Whatzit	Gackenback, 1977	furnace	noun	13	8	1304	1	42	13	1353	6	72	0.47	0.26	0.153846
Harry and the Terrible Whatzit	Gackenback, 1977	gloomy	adjective	0	4	2047	1	254	10	125	6	553	0.5	0.18	0.0769231
Harry and the Terrible Whatzit	Gackenback, 1977	swat	verb	6	10	396	1	91	12	1845	9	205	0.29	0.21	0.153846
Harry and the Terrible Whatzit	Gackenback, 1977	swung	verb	2	8	551	1	2	10	223	5	390	0.18	0.09	0.0769231
Imogene's Antlers	Small, 1985	advice	noun	0	9	1296	1	624	12	1575	8	1339	0.12	0.03	0
Imogene's Antlers	Small, 1985	glared	verb	0	8	2049	1	1	12	669	6	195	0.62	0.24	0.230769
Imogene's Antlers	Small, 1985	overjoyed	adjective	0	5	321	1	10	10	1805	16	2088	0.53	0.26	0.307692
Imogene's Antlers	Small, 1985	prodded	verb	0	6	334	1	179	11	216	5	28	0.74	0.15	0
Imogene's Antlers	Small, 1985	rare	adjective	1	5	2758	2	4987	11	1744	20	736	0.06	0.03	0
Imogene's Antlers	Small, 1985	wandered	verb	1	7	848	2	58	12	353	4	79	0.26	0.09	0.0769231
Otis	Bynum, 2000	hauled	verb	58	5	9	1	8	12	2077	11	225	0.29	0.06	0
Otis	Bynum, 2000	hooves	noun	0	11	202	1	189	12	1646	7	240	0.21	0.06	0.230769
Otis	Bynum, 2000	ripe	adjective	9	8	537	1	529	9	1638	6	91	0.24	0.09	0.153846
Otis	Bynum, 2000	sidelines	noun	0	10	49	2	107	14	243	14	113	0.03	0.15	0.153846
Otis	Bynum, 2000	silky	adjective	9	8	1340	1	25	11	1272	5	50	0.21	0	0
Otis	Bynum, 2000	spotless	adjective	0	5	471	2	813	11	507	9	315	0.71	0.18	0.153846
Possum and the Peeper	Hunt, 1998	clamor	noun	0	9	1666	1	107	11	605	10	985	0.32	0.12	0.153846
Possum and the Peeper	Hunt, 1998	grumbling	verb	0	5	20	1	0	11	2859	14	452	0.18	0.15	0.0769231
Possum and the Peeper	Hunt, 1998	marsh	noun	1	9	90	1	1	12	1530	6	1737	0.09	0.12	0.0769231
Possum and the Peeper	Hunt, 1998	peering	verb	0	8	1313	1	16	11	1550	11	145	0.5	0.12	0
Possum and the Peeper	Hunt, 1998	racket	noun	0	6	52	2	1725	12	274	16	1063	0.76	0.24	0.153846
Possum and the Peeper	Hunt, 1998	squinting	verb	0	7	427	1	9	12	579	12	86	0.32	0.09	0
Shy Charles	Wells, 1988	embarrassed	adjective	1	6	29	1	6	13	778	6	4100	0.06	0.03	0
Shy Charles	Wells, 1988	murmured	verb	0	8	89	1	1	11	363	5	2095	0.71	0.18	0
Shy Charles	Wells, 1988	nervous	adjective	8	5	80	1	1	13	716	7	2085	0.47	0.15	0.0769231
Shy Charles	Wells, 1988	scarlet	noun	9	4	336	2	822	11	289	7	25	0.65	0.29	0.0769231
Shy Charles	Wells, 1988	success	noun	0	11	1081	1	208	12	186	5	6324	0.5	0.18	0
Shy Charles	Wells, 1988	trembled	verb	0	9	143	1	1	10	509	6	4	0.18	0.03	0
Swimmy	Lionni, 1963	gulp	noun	0	9	779	1	8	13	1779	10	2954	0.29	0.26	0.307692
Swimmy	Lionni, 1963	invisible	adjective	18	5	295	1	125	15	1307	7	123	0.35	0.38	0.307692
Swimmy	Lionni, 1964	marvel	noun	0	9	259	1	86	11	262	19	236	0.03	0	0.0769231
Swimmy	Lionni, 1965	midday	noun	0	6	375	1	204	11	1295	19	593	0.12	0.24	0.153846
Swimmy	Lionni, 1963	swaying	verb	0	8	547	1	7	10	172	13	178	0.35	0.26	0.230769
Swimmy	Lionni, 1963	swift	adjective	0	5	192	1	316	12	358	13	921	0.76	0.18	0.153846
The Bear Under the Stairs	Cooper, 1993	awful	adjective	26	5	772	1	354	10	218	6	855	0.32	0.24	0.0769231
The Bear Under the Stairs	Cooper, 1993	crept	verb	1	6	143	1	11	11	1725	5	1311	0.44	0.24	0.307692
The Bear Under the Stairs	Cooper, 1993	decided	verb	13	5	4799	1	4	9	626	14	262	0.15	0.06	0
The Bear Under the Stairs	Cooper, 1993	haddock	noun	0	8	134	1	217	11	1501	7	20	0.76	0.21	0.384615
The Bear Under the Stairs	Cooper, 1993	noticed	verb	2	7	1848	1	9	9	241	11	143	0.41	0.03	0.0769231
The Bear Under the Stairs	Cooper, 1993	tight	adjective	58	5	275	2	254	13	232	7	139	0.12	0.09	0.384615
The Caterpillar That Roared	Lawrence, 2000	gaze	verb	0	8	2240	1	1	15	1306	14	1003	0.29	0.06	0
The Caterpillar That Roared	Lawrence, 2000	horrified	adjective	0	5	107	1	7	11	1563	3	0	0.62	0.24	0.384615
The Caterpillar That Roared	Lawrence, 2000	ripples	noun	0	5	1167	1	8	9	877	10	996	0.32	0.03	0.0769231
The Caterpillar That Roared	Lawrence, 2000	snuggled	verb	0	9	543	1	1	11	1226	7	1155	0.21	0.18	0.0769231
The Caterpillar That Roared	Lawrence, 2000	surface	noun	0	5	659	1	440	10	699	10	70	0.09	0.06	0
The Caterpillar That Roared	Lawrence, 2000	twitch	verb	0	5	91	1	16	14	1744	19	755	0.09	0.03	0
What Do You Do With a Kangaroo	Mayer, 1973	flashing	adjective	12	8	446	1	1	9	990	27	1075	0.29	0.35	0.307692
What Do You Do With a Kangaroo	Mayer, 1973	frayed	adjective	0	7	980	1	22	11	547	14	52	0.56	0	0
What Do You Do With a Kangaroo	Mayer, 1973	smooth	adjective	23	4	159	1	411	11	1214	14	1343	0.09	0.09	0
What Do You Do With a Kangaroo	Mayer, 1973	stale	adjective	9	6	4207	1	513	13	525	8	369	0.5	0.24	0.0769231
What Do You Do With a Kangaroo	Mayer, 1973	tailor	noun	0	7	244	1	2	10	795	16	1030	0.5	0.21	0.153846
What Do You Do With a Kangaroo	Mayer, 1973	worn	adjective	8	7	173	1	9	9	240	22	543	0.47	0.12	0.307692
Storkel, H. L., Voelmle, K., Fierro, V., Flake, K., Fleming, K. K., & Romine, R. S. (2017). Interactive book reading to accelerate word learning by kindergarten children with Specific Language Impairment (SLI): Identifying an adequate intensity and variation in treatment response. Language, Speech, and Hearing Services in School, 48, 16-30. doi:10.1044/2016_LSHSS-16-0014
Storkel, H. L. & Hoover, J. R. (2010). An on-line calculator to compute phonotactic probability and neighborhood density based on child corpora of spoken American English. Behavior Research Methods, 42, 497-506. doi:10.3758/BRM.42.2.497
